# Supplementary material for: Correcting for experiment-specific variability in expression compendia can remove underlying signals
Source: PubMed Central journal article supplement (PMC7607552; doi:10.1093/gigascience/giaa117), 2020-11-03
Supplement: giaa117_response_to_reviewer_comments_original_submission.pdf [file giaa117_response_to_reviewer_comments_original_submission.pdf]

## Author's Response To Reviewer Comments

Close

We uploaded the response to reviewer as a cover letter because we embedded figures to provide clarity and a self-contained document.

Close
